# Supplementary material for: Crystal structure of KMnPO4F with short- and long-range order inside the layered magnetic system
Source: Royal Society of Chemistry journal article supplement (doi:10.1039/d4dt00878b), 2024-01-01
Supplement: d4dt00878b1.pdf [file d4dt00878b1.pdf]

## SUPPLEMENTARY INFORMATION

### Crystal structure of $\text{KMnPO}_4\text{F}$ with short and long range order inside the layered magnetic system

*Olga V. Yakubovich,<sup>1\*</sup> Larisa V. Shvanskaya,<sup>1,2</sup> Galina V. Kiriukhina,<sup>1,3</sup> Sergei Simonov,<sup>4</sup>  
Anatoliy S. Volkov,<sup>5</sup> Olga V. Dimitrova,<sup>1</sup> Vladimir V. Korolev,<sup>1,2</sup> Yevgeniy A. Ovchenkov,<sup>1,2</sup>  
Alexander N. Vasiliev<sup>1,2</sup>*

<sup>1</sup>Moscow State University, Moscow 119991, Russia

<sup>2</sup>National University of Science and Technology, Moscow 119049, Russia

<sup>3</sup>Institute of Experimental Mineralogy, RAS, Chernogolovka 142432, Russia

<sup>4</sup>Institute of Solid State Physics, RAS, Chernogolovka 142432, Russia

<sup>5</sup>Skolkovo Institute of Science and Technology, Moscow 121205, Russia

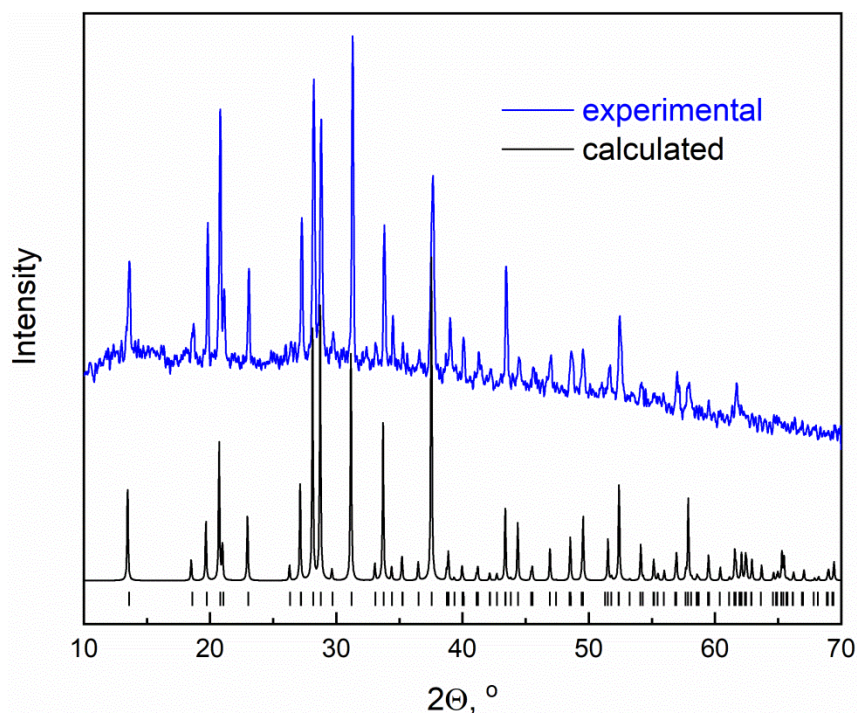

**Fig. S1.** Experimental and calculated powder XRD pattern of  $\text{KMnPO}_4\text{F}$  (the vertical ticks indicate the Bragg positions).

**Table S1.** Selected geometric parameters for KMnPO<sub>4</sub>F (Å)

|                       |           |                       |           |
|-----------------------|-----------|-----------------------|-----------|
| Mn1—F1                | 1.825 (2) | K1—O4 <sup>iii</sup>  | 2.931 (3) |
| Mn1—O5                | 1.887 (3) | K1—O3 <sup>viii</sup> | 3.088 (3) |
| Mn1—O2 <sup>i</sup>   | 1.919 (3) | K1—O3 <sup>ix</sup>   | 3.106 (3) |
| Mn1—O4 <sup>ii</sup>  | 1.919 (3) | K1—O5 <sup>vii</sup>  | 3.160 (3) |
| Mn1—O3 <sup>iii</sup> | 2.092 (3) | K1—O4 <sup>i</sup>    | 3.249 (3) |
| K1—F1                 | 2.590 (3) | P1—O3                 | 1.529 (3) |
| K1—F1 <sup>iv</sup>   | 2.712 (3) | P1—O5                 | 1.534 (3) |
| K1—O5 <sup>v</sup>    | 2.760 (3) | P1—O4                 | 1.538 (3) |
| K1—F1 <sup>vi</sup>   | 2.839 (3) | P1—O2                 | 1.552 (3) |
| K1—O2 <sup>vii</sup>  | 2.879 (3) |                       |           |

Symmetry code(s): (i)  $x+1/2, -y+1/2, -z+1$ ; (ii)  $-x+1, y+1/2, -z+1/2$ ; (iii)  $x-1/2, -y+1/2, -z+1$ ; (iv)  $x-1/2, -y+3/2, -z+1$ ; (v)  $-x+3/2, -y+1, z+1/2$ ; (vi)  $x+1/2, -y+3/2, -z+1$ ; (vii)  $-x+1/2, -y+1, z+1/2$ ; (viii)  $x, y+1, z$ ; (ix)  $-x+1, y+1/2, -z+3/2$ .

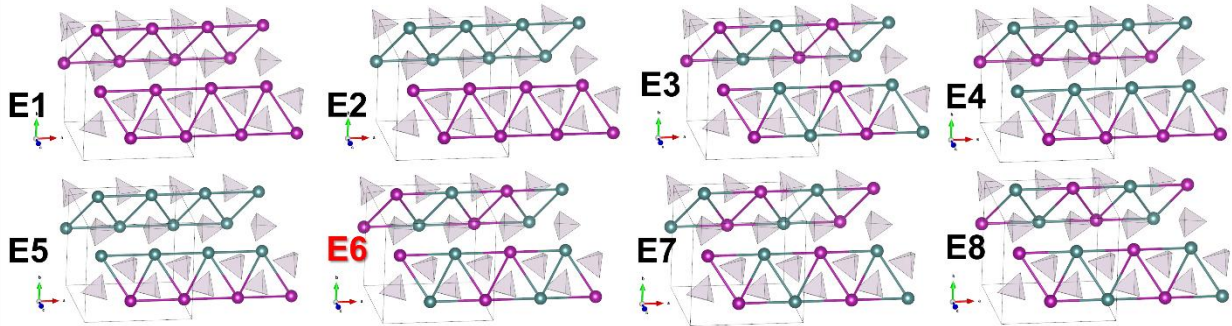**Fig. S2.** The spin configurations considered in DFT calculations for KMnPO<sub>4</sub>F. Green and magenta atoms represent spin up and spin down orientations of Mn<sup>3+</sup>; PO<sub>4</sub><sup>3-</sup> groups are shown by grey tetrahedra. The lowest energy configuration 6 is marked in red.

Table S2. Crystal chemical data, synthesis conditions and magnetic properties of phosphates related to the  $AMPO_4F$  morphotropic series

|                                                     |                                                                                                                            |                                                      |                                                       |                                                                                                        |                                                                                                                                                                                 |                            |
|-----------------------------------------------------|----------------------------------------------------------------------------------------------------------------------------|------------------------------------------------------|-------------------------------------------------------|--------------------------------------------------------------------------------------------------------|---------------------------------------------------------------------------------------------------------------------------------------------------------------------------------|----------------------------|
| BaCu <sup>2+</sup> PO <sub>4</sub> Cl               | <i>a</i> 7.885(2) <i>V</i> 495.9(2)<br><i>b</i> 8.650(1) $\rho$ 4.44<br><i>c</i> 7.270(1) <i>Z</i> 4                       | orthorhombic<br>$P2_12_12_1 (D^4_2)$<br>chiral       | Cu <sup>2+</sup> 0.57<br>$S = 0.5, 3d^9$              | Cu–O3 1.937(4) Cu–O4 2.076(4)<br>O1 1.981(4) Cl 2.773(4)<br>O2 1.981(4) <b>Cl<sup>r</sup> 3.259(4)</b> | Synthesis from flux at 800° C.                                                                                                                                                  | Etheredge & Hwu, 1995      |
| BaFe <sup>3+</sup> PO <sub>4</sub> F <sub>2</sub>   | <i>a</i> 5.2440(2) <i>V</i> 470.52(3)<br><i>b</i> 12.7889(5) $\rho$<br><i>c</i> 7.1765(2) <i>Z</i> 4<br>$\beta$ 102.142(2) | monoclinic<br>$P2_1/n (C^5_{2h})$<br>centrosymmetric | Fe <sup>3+</sup> 0.64 <sub>5</sub><br>$S = 2.5, 3d^5$ | Fe1–F2 1.926(4)x2 Fe2–F1 1.992(4)x2<br>O1 1.950(4)x2 F1 1.964(4)x2<br>O3 2.003(4)x2 O2 2.023(4)x2      | Hydrothermal synthesis at 230° C.<br>A spin–flop transition at 2 K (field at Bsf = 3.1 T), stemming from the antiferromagnetic ordering of chain formed by F sharing octahedra. | Jiang <i>et al.</i> , 2019 |
| BaMn <sup>3+</sup> PO <sub>4</sub> F <sub>2</sub> * | <i>a</i> 5.1463(9) <i>V</i> 461.1<br><i>b</i> 12.691(2) $\rho$ 4.69<br><i>c</i> 7.871(1) <i>Z</i> 4<br>$\beta$ 116.24(3)   | monoclinic<br>$P2_1/c (C^5_{2h})$<br>centrosymmetric | Mn <sup>3+</sup> 0.65<br>$S = 2, 3d^4$                | Mn1–O2 1.870(5)x2 Mn2–F1 1.858(4)x2<br>O4 2.014(5)x2 O3 1.936(5)x2<br>F2 2.024(4)x2 F2 2.042(5)x2      | Hydrothermal synthesis at 234° C.<br>Antiferromagnetic long-range ordering at 14 K.                                                                                             | Pei <i>et al.</i> , 2016   |
| BaMn <sup>3+</sup> PO <sub>4</sub> FCl *            | <i>a</i> 7.221(1) <i>V</i> 521.60<br><i>b</i> 8.535(1) $\rho$ 4.35<br><i>c</i> 8.870(1) <i>Z</i> 4<br>$\beta$ 107.41(3)    | - “ -                                                | Mn <sup>3+</sup> 0.65<br>$S = 2, 3d^4$                | Mn–O1 1.881(3) Mn–O3 1.924(3)<br>O2 1.884(3) F 2.108(2)<br>O4 1.916(3) Cl 2.640(1)                     | Hydrothermal synthesis at 234° C.<br>Antiferromagnetic long-range ordering at 9.8 K.                                                                                            | Pei <i>et al.</i> , 2016   |

\* Low-temperature X-ray diffraction data.

## References

1. K. M. S. Etheredge, S. J. Hwu, *Inorg. Chem.* 1995, **34**, 11, 3123-3125.
2. J. Jiang, S. Lee, B. Zhu, Y. Yu, J. C. Waerenborgh, K.-Y. Choi, & M. Lü, *Inorg. Chem.* 2019, **58**, (1), 133-142.
3. D.-T. Pei, W. Sun, Y.-X. Huang, Z.-M. Sun, Y. Pan, J.-X. Mi, *J. Solid State Chem.*, 2016, **234**, 29-35.
